# Supplementary material
Source: PubMed Central journal article supplement (PMC3783620)
Supplement: NIHMS481172-supplement-01.pdf [file NIHMS481172-supplement-01.pdf]

**Table S1:** ICD-9-CM codes for primary discharge diagnosis

| <b>Diagnosis</b>                    | <b>ICD-9-CM-codes</b>                                                                                                                                                                                                                                                                                                                                                                                                                                                                                        |
|-------------------------------------|--------------------------------------------------------------------------------------------------------------------------------------------------------------------------------------------------------------------------------------------------------------------------------------------------------------------------------------------------------------------------------------------------------------------------------------------------------------------------------------------------------------|
| <b>Infections and Access Issues</b> |                                                                                                                                                                                                                                                                                                                                                                                                                                                                                                              |
| Septicemia                          | 038.0, 038.10, 038.11, 038.19, 038.2, 038.3, 038.40, 038.41, 038.42, 038.43, 038.44, 038.49, 038.8, 038.9                                                                                                                                                                                                                                                                                                                                                                                                    |
| Bacteremia                          | 790.7                                                                                                                                                                                                                                                                                                                                                                                                                                                                                                        |
| Fungemia/Fungal endocarditis        | 112.5, 112.81, 115.04, 115.14, 114.94                                                                                                                                                                                                                                                                                                                                                                                                                                                                        |
| Other blood stream infections       | 003.1, 020.2, 022.3, 036.2, 036.3, 098.89                                                                                                                                                                                                                                                                                                                                                                                                                                                                    |
| Pneumonia                           | 481, 482.XX, 483.X, 485, 486                                                                                                                                                                                                                                                                                                                                                                                                                                                                                 |
| Dialysis access complications       | 996.62, 996.68, 996.73                                                                                                                                                                                                                                                                                                                                                                                                                                                                                       |
| <b>Cardiovascular diseases</b>      |                                                                                                                                                                                                                                                                                                                                                                                                                                                                                                              |
| Acute coronary syndrome             | 410.XX, 411.XX                                                                                                                                                                                                                                                                                                                                                                                                                                                                                               |
| Congestive heart failure            | 398.91, 402.01, 402.11, 402.91, 404.01, 404.11, 404.91, 404.03, 404.13, 404.93, 428.XX                                                                                                                                                                                                                                                                                                                                                                                                                       |
| Fluid overload                      | 276.6                                                                                                                                                                                                                                                                                                                                                                                                                                                                                                        |
| Atrial fibrillation/flutter         | 427.3X                                                                                                                                                                                                                                                                                                                                                                                                                                                                                                       |
| <b>GI bleed</b>                     |                                                                                                                                                                                                                                                                                                                                                                                                                                                                                                              |
| Upper GI bleed                      | 456.0, 456.2, 456.20, 531.0X, 531.2X, 531.4X, 531.6X, 532.0X, 532.2X, 532.4X, 532.6X, 533.0X, 533.2X, 533.4X, 533.6X, 534.0X, 534.2X, 534.4X, 534.6X, 530.7, 535.01, 535.11, 535.21, 535.41, 535.51, 535.61, 537.83, 537.84, 578.0, 578.1                                                                                                                                                                                                                                                                    |
| Lower GI bleed                      | 562.12, 562.13, 569.85, 569.3, 455.2, 455.5, 455.8<br>In addition patients with primary discharge codes indicative of a potential source of lower GI bleeding (009.X, 152.1, 152.2, 152.3, 152.8, 152.9, 153.X, 154.X, 230.1, 230.2, 230.3, 230.4, 230.5, 230.6, 230.7, 230.8, 230.9, 211.3, 211.4, 555.X, 556.X, 557.X, 558.X, 569.41, 569.82, 569.84, 747.61) when used with codes for hemorrhage of gastrointestinal tract unspecified (578.9) or acute posthemorrhagic anemia (285.1) were also included |
| <b>Others</b>                       |                                                                                                                                                                                                                                                                                                                                                                                                                                                                                                              |
| Hyperkalemia                        | 276.7                                                                                                                                                                                                                                                                                                                                                                                                                                                                                                        |
| Hypertensive emergency              | 401.0, 402.0, 402.01, 403.0, 403.01, 404.0, 404.01, 404.03, 405.0, 405.01, 405.09                                                                                                                                                                                                                                                                                                                                                                                                                            |
