# Supplementary material
Source: PubMed Central journal article supplement (PMC3783620)
Supplement: NIHMS481172-supplement-02.pdf [file NIHMS481172-supplement-02.pdf]

**Table S2:** Sensitivity analyses and effect on various outcomes

|                                                                                  | <b>Sensitivity Analysis 1<sup>^</sup></b><br>(N= 1380599) | <b>Sensitivity Analysis 2<sup>^</sup></b><br>(N= 1380599) | <b>Sensitivity Analysis 3<sup>^</sup></b><br>(N= 1380599) | <b>Sensitivity Analysis 4<sup>^</sup></b><br>(N=712237) |
|----------------------------------------------------------------------------------|-----------------------------------------------------------|-----------------------------------------------------------|-----------------------------------------------------------|---------------------------------------------------------|
| <b>Unadjusted Total Mortality (Weekday vs weekend admission)</b>                 | 5.7% vs 6.1%<br>(p<0.001)                                 | 5.8% vs 6.2%<br>(p<0.001)                                 | 7.3% vs 7.8%<br>(p<0.001)                                 | 7.6% vs 8.1%<br>(p=0.005)                               |
| <b>Adjusted odds of total mortality for weekend admission</b>                    | OR 1.04; 95% CI 0.99, 1.10                                | OR 1.07; 95% CI 1.03, 1.11                                | OR 1.07; 95% CI 1.03, 1.11                                | OR 1.07; 95% CI 1.02, 1.13                              |
| <b>Unadjusted Mortality by day 3 of admission (Weekday vs weekend admission)</b> | 4.8% vs 5.7%<br>(p<0.001)                                 | 4.9% vs 5.7%<br>(p<0.001)                                 | 6.1% vs 7.2%<br>(p<0.001)                                 | 6.2% vs 7.3%<br>(p<0.001)                               |
| <b>Adjusted odds of Mortality by day 3 of admission for weekend admission</b>    | OR 1.20; 95% CI 1.12, 1.28                                | OR 1.18; 95% CI 1.10, 1.26                                | OR 1.14; 95% CI 1.05, 1.24                                | OR 1.19; 95% CI 1.10, 1.29                              |
| <b>Adjusted odds of LOS of survivors for weekend admission</b>                   | 1.03 (1.02, 1.04)                                         | 1.02 (1.01, 1.03)                                         | 1.02 (1.01, 1.03)                                         | 1.03 (1.02, 1.04)                                       |
| <b>Adjusted odds of time to death for weekend admission</b>                      | 0.92 (0.88, 0.96)                                         | 0.92 (0.88, 0.96)                                         | 0.90(0.86, 0.93)                                          | 0.90 (0.85, 0.95)                                       |
| <b>Discharge to home (Weekday vs weekend admission)</b>                          | 57.9% vs 56.8%<br>(p<0.001)                               | 57.7.4% vs 56.7%<br>(p<0.001)                             | 55.9% vs 55.1%<br>(p<0.001)                               | 58.4% vs 57.1%<br>(p<0.001)                             |
| <b>Discharge to Skilled nursing Facility (Weekday vs weekend admission)</b>      | 19.6% vs 20.5%<br>(p=0.003)                               | 19.5% vs 20.0%<br>(p=0.008)                               | 19.8% vs 20.3%<br>(p=0.02)                                | 17.5% vs 18.2%<br>(p=0.008)                             |

**^Sensitivity Analyses:**

**Sensitivity Analysis 1:** Including all unique observations along with one of each duplicate observations randomly selected from the database

**Sensitivity Analysis 2:** Including all unique observations along with one of each duplicate observations admitted in the first month for that duplicate observation

**Sensitivity Analysis 3:** Including all unique observations along with one of each duplicate observations admitted in the last month for that duplicate observation

**Sensitivity Analysis 4:** Including only unique observations and eXcluding any duplicate observations
